# Supplementary material
Source: MDPI journal article supplement (https://www.mdpi.com/2073-4441/12/8/2102)
Supplement: s1 [file s1]

# Seasonal and Diurnal Variation of Air/Water Exchange of Gaseous Mercury in a Southern Reservoir Lake (Cane Creek Lake, Tennessee, USA)

William C. Crocker and Hong Zhang \*

Department of Chemistry, Campus Box 5055, Tennessee Tech University (TTU), Cookeville, TN 38505-0001, USA

## Supplementary materials

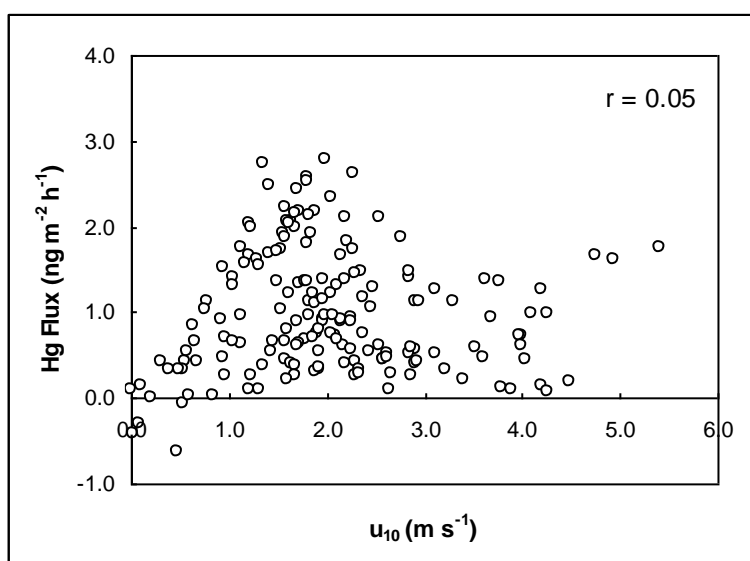

**SM-Figure 1.** The relationship between all individual emission flux points versus the wind speed values ( $u_{10}$ ) for the entire study at Cane Creek Lake (TN, USA)

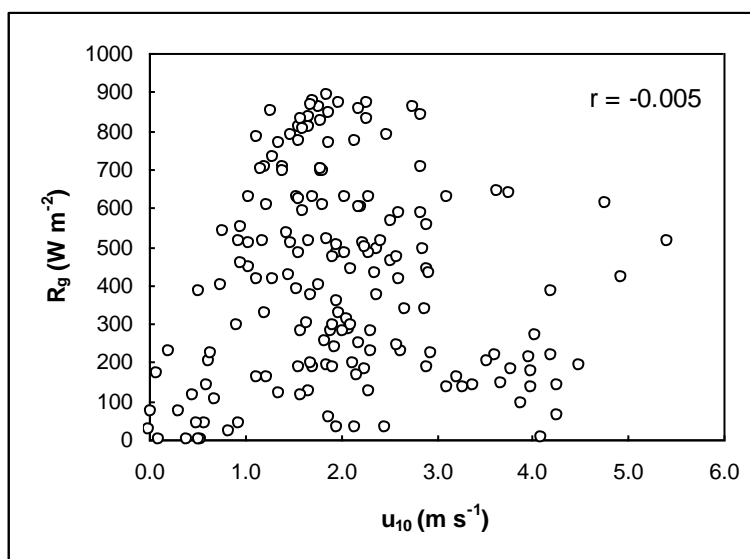

**SM-Figure 2.** The relationship between all individual solar radiation points ( $R_g$ ) versus the wind speed values ( $u_{10}$ ) for the entire study at Cane Creek Lake (TN, USA).
